# Supplementary material
Source: ML conference proceedings conference paper supplement (https://openreview.net/forum?id=HU5elOLj5x5)
Supplement: supplementary_material [file attachment]

---

# Bayesian Spillover Graphs for Dynamic Networks: Supplementary Material

---

Grace Deng<sup>1</sup>

David S. Matteson<sup>1</sup>

<sup>1</sup>Department of Statistics & Data Science, Cornell University, Ithaca, NY, USA

## A MOVING AVERAGE REPRESENTATION OF VAR(1)

We can rewrite a VAR(1) model with a moving average representation [Tsay, 2013] using the mean-adjusted model, which is useful for computing variances of forecast errors.

We define the **mean-adjusted model**  $\tilde{\mathbf{z}}_t = \mathbf{z}_t - \mu$ , where  $\mu = (I_d - \phi_1)^{-1}\phi_0$ .

Then,

$$\begin{aligned}\tilde{\mathbf{z}}_t &= \mathbf{a}_t + \phi_1 \tilde{\mathbf{z}}_{t-1} \\ &= \mathbf{a}_t + \phi_1(\mathbf{a}_{t-1} + \phi_1 \tilde{\mathbf{z}}_{t-2}) \\ &= \mathbf{a}_t + \phi_1 \mathbf{a}_{t-1} + \phi_1^2(\mathbf{a}_{t-2} + \phi_1 \tilde{\mathbf{z}}_{t-3}) \\ &= \mathbf{a}_t + \phi_1 \mathbf{a}_{t-1} + \phi_1^2 \mathbf{a}_{t-2} + \phi_1^3 \mathbf{a}_{t-3} + \dots\end{aligned}$$

Hence,

$$\begin{aligned}\mathbf{z}_t &= \mu + \tilde{\mathbf{z}}_t \\ &= \mu + \mathbf{a}_t + \phi_1 \mathbf{a}_{t-1} + \phi_1^2 \mathbf{a}_{t-2} + \phi_1^3 \mathbf{a}_{t-3} + \dots \\ &= \mu + \mathbf{a}_t + \psi_1 \mathbf{a}_{t-1} + \psi_2 \mathbf{a}_{t-2} + \dots \\ &= \mu + \sum_{i=0}^{\infty} \psi_i \mathbf{a}_{t-i}\end{aligned}$$

where  $\psi_i = \phi_1^i$  for  $i \geq 0$ .

## B PROOF OF THEOREM 1

**Theorem 1.** *If  $\phi_1$  is a DAG, then (1) no autocorrelation exists, (2)  $\phi_1$  can be specified by a strictly triangular matrix, (3) all eigenvalues of  $\phi_1$  are 0 and hence  $z_t$  is stationary.*

**Proof:** By definition of DAG, no cycles can exist in the adjacency matrix, in this case,  $\phi_1$ . Hence, the diagonal entries which indicate dependency of  $z_{it}$  on  $z_{i,t+1}$  is necessarily 0, and thereby proving point (1).

Note that by definition, there exists a topological ordering on the vertices if and only if a graph has no directed cycles. Because  $\phi_1$  is a DAG, we can relabel the  $d$  vertices (time series components) as  $v_1, v_2, \dots, v_d$ . If  $v_i v_{i'}$  is a directed edge into  $i$  from  $i'$  (indicating Granger-causality), then  $i > i'$ . Hence, all entries above the main diagonal are also 0 because these are entries for which  $i < i'$ . Combined with point (1) where main diagonal entries are also 0, this satisfies the definition of a strictly lower-triangular matrix (2).

We've shown that the adjacency matrix of a DAG is strictly lower-triangular via permutation, and note that the order of individual time series components does not matter, although in this case the  $d$  vertices are ordered from source to sink nodes.

The eigenvalues of any lower-triangular matrix is just its diagonal components [Axler, 1997], meaning that all eigenvalues for  $\phi_1$  is just 0. Since these are strictly less than 1 in magnitude, we can conclude that  $z_t$  is stationary (3).

## C EVALUATING ACCURACY FOR SOURCE & SINK NODE IDENTIFICATION

First, define Discounted Cumulative Gain (DCG) at position  $d$ , for  $d$  nodes arranged in a particular order:

$$DCG_d = \sum_{i=1}^d \frac{rel_i}{\log_2(i+1)}$$

where  $rel_i$  is the graded precision score of node at position  $i$ , e.g. {1, 0.5, 0} for {source, intermediary, sink} nodes respectively. Greater penalty is given for source or sink nodes ranked in lower positions. NDCG [Valizadegan et al., 2009] then equals DCG divided by Ideal Discounted Cumulative Gain (IDCG):

$$NDCG_d = \frac{DCG_d}{IDCG_d}, \quad IDCG_d = \sum_{i=1}^{|rel_d|} \frac{rel_i}{\log_2(i+1)}$$

and  $|rel_d|$  represents the optimal order of nodes, which is given by the ground truth labels of each node.

## D BSG FOR IDENTIFYING SINK AND SOURCE NODES

### D.1 ABLATION EXPERIMENT - ERROR COVARIANCE $\Sigma_a$

Table 1: Average NDCG (Accuracy) for Identifying Sink & Source Nodes with Dependent Errors, 5 Rep.

| Directed Acyclic | A. Weak Dependency $\sigma_{jk} = 0.1$ |                       | B. Moderate Dependency $\sigma_{jk} = 0.5$ |                       | C. Strong Dependency, $\sigma_{jk} = 0.9$ |                       |
|------------------|----------------------------------------|-----------------------|--------------------------------------------|-----------------------|-------------------------------------------|-----------------------|
|                  | NDCG@24<br>Source Nodes                | NDCG@24<br>Sink Nodes | NDCG@24<br>Source Nodes                    | NDCG@24<br>Sink Nodes | NDCG@24<br>Source Nodes                   | NDCG@24<br>Sink Nodes |
| BSG, $h = 1$     | 0.938 ± 0.04                           | <b>1</b> ± 0          | 0.951 ± 0.004                              | <b>1</b> ± 0          | 0.925 ± 0.016                             | <b>1</b> ± 0          |
| BSG, $h = 5$     | 0.995 ± 0.006                          | 0.999 ± 0.001         | <b>0.993</b> ± 0.004                       | 0.997 ± 0.002         | 0.961 ± 0.011                             | <b>0.993</b> ± 0.001  |
| BSG, $h = 10$    | <b>0.99</b> ± 0.004                    | 0.994 ± 0.002         | 0.989 ± 0.006                              | 0.991 ± 0.003         | <b>0.975</b> ± 0.01                       | 0.988 ± 0.004         |
| VAR-Between      | 0.778 ± 0.068                          | 0.796 ± 0.068         | —                                          | —                     | —                                         | —                     |
| VAR-Closeness    | 0.648 ± 0.024                          | 0.926 ± 0.024         | —                                          | —                     | —                                         | —                     |
| VAR-Degree       | 0.8 ± 0.045                            | 0.868 ± 0.053         | —                                          | —                     | —                                         | —                     |
| VAR-Eigen        | 0.71 ± 0.063                           | 0.864 ± 0.063         | —                                          | —                     | —                                         | —                     |
| DBN-Between      | 0.75 ± 0.036                           | 0.825 ± 0.036         | 0.747 ± 0.085                              | 0.827 ± 0.085         | 0.721 ± 0.075                             | 0.853 ± 0.075         |
| DBN-Closeness    | 0.842 ± 0.07                           | 0.733 ± 0.07          | 0.827 ± 0.071                              | 0.747 ± 0.071         | 0.801 ± 0.114                             | 0.773 ± 0.114         |
| DBN-Degree       | 0.85 ± 0.06                            | 0.82 ± 0.05           | 0.834 ± 0.08                               | 0.849 ± 0.031         | 0.827 ± 0.092                             | 0.879 ± 0.05          |
| DBN-Eigen        | 0.752 ± 0.031                          | 0.822 ± 0.031         | 0.73 ± 0.081                               | 0.845 ± 0.081         | 0.713 ± 0.071                             | 0.862 ± 0.071         |
| GVAR-Between     | 0.729 ± 0.066                          | 0.845 ± 0.066         | 0.684 ± 0.078                              | 0.891 ± 0.078         | 0.729 ± 0.04                              | 0.845 ± 0.04          |
| GVAR-Closeness   | 0.685 ± 0.037                          | 0.89 ± 0.037          | 0.632 ± 0.04                               | 0.943 ± 0.04          | 0.689 ± 0.062                             | 0.885 ± 0.062         |
| GVAR-Degree      | †                                      | †                     | †                                          | †                     | †                                         | †                     |
| GVAR-Eigen       | 0.935 ± 0.016                          | 0.639 ± 0.016         | 0.953 ± 0.039                              | 0.621 ± 0.039         | 0.89 ± 0.04                               | 0.685 ± 0.04          |

— indicates retrieved NGC graph is degenerate, e.g., only edges are self-directed.

† indicates network measure cannot distinguish between nodes, e.g., all in/out degrees are equal.

### D.2 MULTISPECIES LOTKA-VOLTERRA - NONLINEAR DYNAMIC SYSTEMS

## E EVALUATING KINCADE FIRE SPILLOVERS

Table 2: Average NDCG (Accuracy) for Identifying Sink & Source Nodes with Nonlinear Systems, 5 Rep.

| Multi-species LV | $d = 20, T = 50$                    |                                     | $d = 20, T = 200$                   |                                     | $d = 20, T = 1000$                 |                                     |
|------------------|-------------------------------------|-------------------------------------|-------------------------------------|-------------------------------------|------------------------------------|-------------------------------------|
|                  | NDCG@20<br>Source (Predator)        | NDCG@20<br>Sink (Prey)              | Source (Predator)                   | Sink (Prey)                         | Source (Predator)                  | Sink (Prey)                         |
| BSG, $h = 1$     | $0.995 \pm 0.004$                   | $0.865 \pm 0.045$                   | <b><math>0.973 \pm 0.013</math></b> | <b><math>0.939 \pm 0.039</math></b> | $0.982 \pm 0.015$                  | <b><math>0.811 \pm 0.069</math></b> |
| BSG, $h = 5$     | <b><math>0.995 \pm 0.002</math></b> | $0.905 \pm 0.046$                   | $0.945 \pm 0.021$                   | $0.931 \pm 0.047$                   | $0.967 \pm 0.024$                  | $0.755 \pm 0.035$                   |
| BSG, $h = 10$    | $0.989 \pm 0.01$                    | <b><math>0.946 \pm 0.015</math></b> | $0.892 \pm 0.058$                   | $0.907 \pm 0.056$                   | $0.932 \pm 0.031$                  | $0.711 \pm 0.074$                   |
| VAR-Between      | $0.71 \pm 0.058$                    | $0.84 \pm 0.058$                    | $0.721 \pm 0.145$                   | $0.828 \pm 0.145$                   | —                                  | —                                   |
| VAR-Closeness    | $0.781 \pm 0.093$                   | $0.768 \pm 0.093$                   | $0.78 \pm 0.09$                     | $0.769 \pm 0.09$                    | —                                  | —                                   |
| VAR-Degree       | $0.768 \pm 0.091$                   | $0.748 \pm 0.071$                   | $0.679 \pm 0.084$                   | $0.737 \pm 0.077$                   | —                                  | —                                   |
| VAR-Eigen        | $0.812 \pm 0.087$                   | $0.738 \pm 0.087$                   | $0.881 \pm 0.037$                   | $0.669 \pm 0.037$                   | —                                  | —                                   |
| DBN-Between      | $0.796 \pm 0.125$                   | $0.753 \pm 0.125$                   | $0.808 \pm 0.091$                   | $0.742 \pm 0.091$                   | $0.892 \pm 0.107$                  | $0.657 \pm 0.107$                   |
| DBN-Closeness    | $0.796 \pm 0.075$                   | $0.754 \pm 0.075$                   | $0.806 \pm 0.074$                   | $0.743 \pm 0.074$                   | $0.854 \pm 0.086$                  | $0.696 \pm 0.086$                   |
| DBN-Degree       | $0.801 \pm 0.072$                   | $0.756 \pm 0.101$                   | $0.825 \pm 0.093$                   | $0.724 \pm 0.112$                   | $0.891 \pm 0.061$                  | $0.704 \pm 0.072$                   |
| DBN-Eigen        | $0.753 \pm 0.086$                   | $0.797 \pm 0.086$                   | $0.8 \pm 0.111$                     | $0.75 \pm 0.111$                    | $0.797 \pm 0.067$                  | $0.748 \pm 0.073$                   |
| GVAR-Between     | $0.736 \pm 0.077$                   | $0.814 \pm 0.077$                   | $0.816 \pm 0.111$                   | $0.733 \pm 0.111$                   | $0.741 \pm 0.063$                  | $0.809 \pm 0.063$                   |
| GVAR-Closeness   | $0.744 \pm 0.093$                   | $0.806 \pm 0.093$                   | $0.83 \pm 0.114$                    | $0.72 \pm 0.114$                    | <b><math>0.996 \pm 0.01</math></b> | $0.554 \pm 0.01$                    |
| GVAR-Degree      | †                                   | †                                   | †                                   | †                                   | †                                  | †                                   |
| GVAR-Eigen       | $0.791 \pm 0.129$                   | $0.758 \pm 0.129$                   | $0.746 \pm 0.098$                   | $0.803 \pm 0.098$                   | $0.816 \pm 0.077$                  | $0.734 \pm 0.077$                   |

— indicates retrieved NGC graph is degenerate, e.g., only edges are self-directed.

† indicates network measure cannot distinguish between nodes, e.g., all in/out degrees are equal.

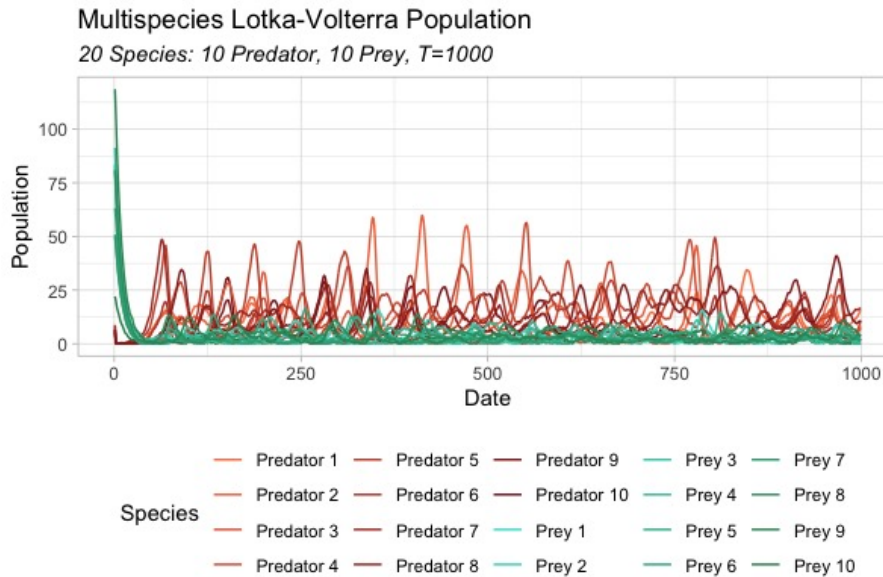

Figure 1: Example Multi-species Lotka-Volterra Population with  $d = 20$  and  $T = 1000$ . Warm colors refer to the 10 predator species and cool colors refer to the 10 prey species. Each predator hunts 2 prey and each prey is hunted by 2 predators.

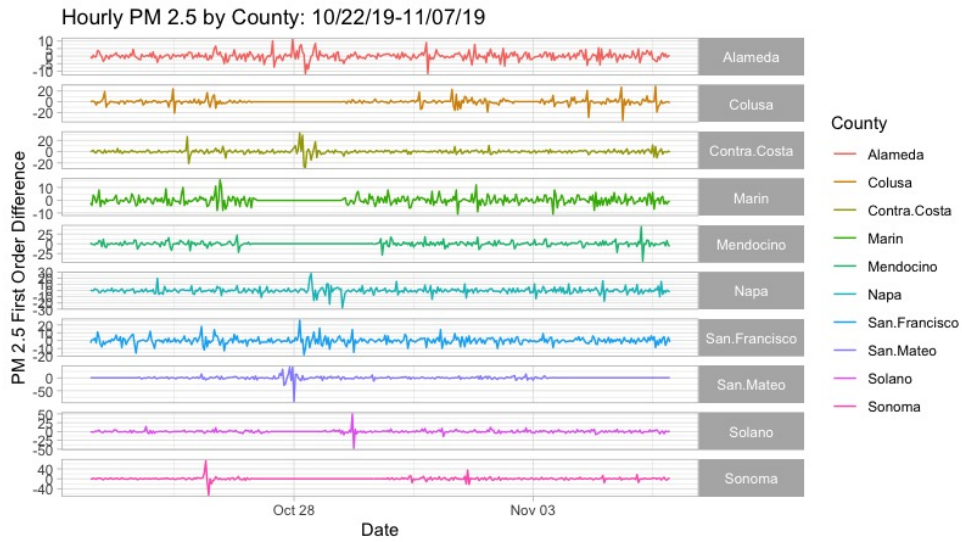

Figure 2: Hourly PM 2.5 Concentration (FOD) by County During Kincade Fire - Oct. 22 to Nov. 7, 2019.

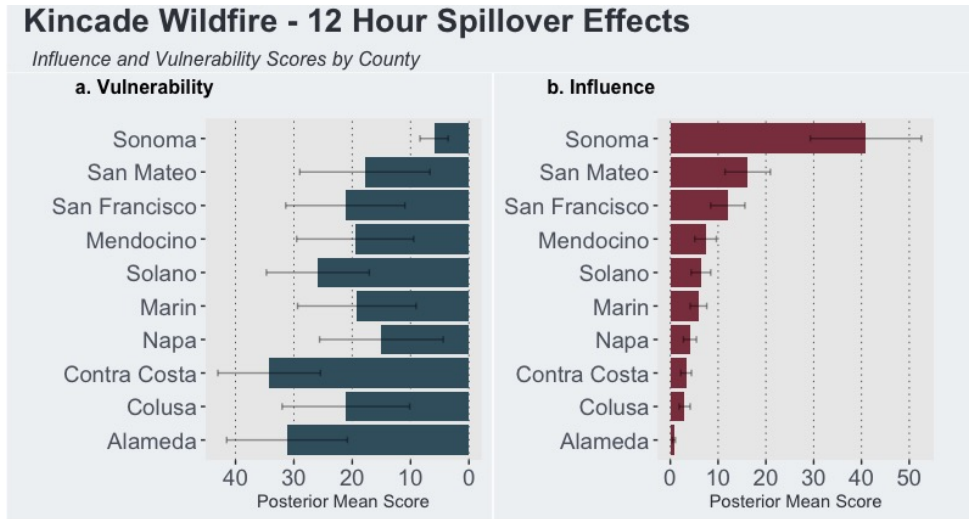

Figure 3: County Ranking by BSG Importance and Vulnerability Scores,  $h = 12$ .

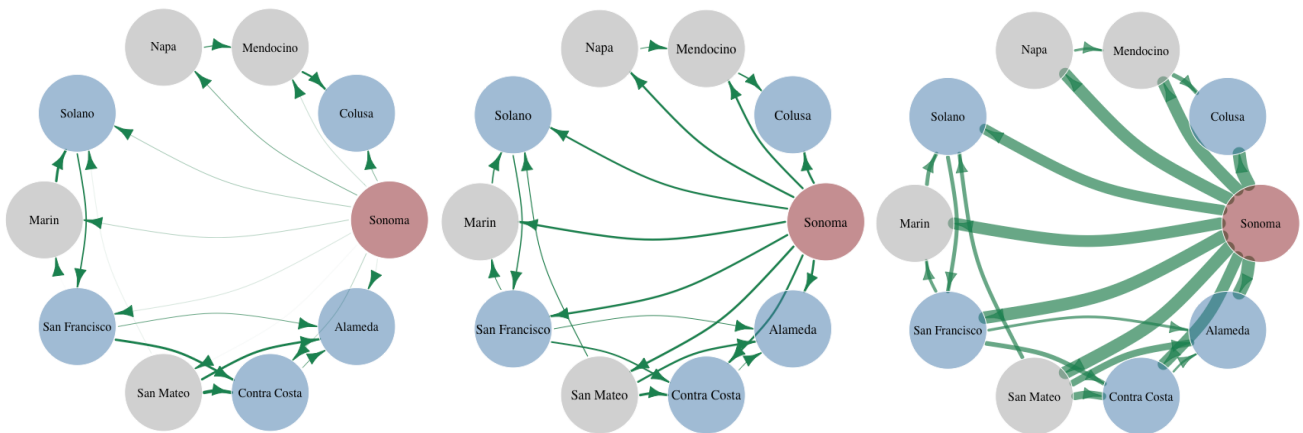

Figure 4: From left to right: Lower 95% HPDI Bound, Posterior Mean, and Upper 95% HPDI Bound. BSG for Kincade Fire,  $h=12$  hours ahead. Note the strong variability in spillovers (edge weights) originating from Sonoma County and tighter intervals for indirect spillovers between San Francisco, Contra Costa, and Alameda counties.

## References

Sheldon Jay Axler. *Linear algebra done right*, volume 2. Springer, 1997.

Ruey S Tsay. *Multivariate Time Series Analysis: With R and Financial Applications*. John Wiley & Sons, 2013.

Hamed Valizadegan, Rong Jin, Ruofei Zhang, and Jianchang Mao. Learning to rank by optimizing ndcg measure. In *Advances in neural information processing systems*, pages 1883–1891, 2009.
